# Supplementary material
Source: publisher site journal article supplement (https://www.degruyterbrill.com/publication/journal_key/MGMC/downloadAsset/MGMC_Manuscript%20template%20Review%20Article.docx)
Supplement: Supplementary file 1 [file MGMC_Manuscript%20template%20Review%20Article.docx]

**Title of the paper**

(title should be informative, specific, and up to 75 characters, including spaces)

**Running title of the paper**

(short version of the title; up to 50 characters, including spaces)

Name1 Surname11, Name2 Surname22, and Name3 Surname31,2,*

1 first affiliation

2 second affiliation

* Corresponding author: please insert email address here (there can be more than one corresponding author)

**Abstract:** Text of the abstract (up to 200 words; should be understandable without reference to the text – please do not use citations and references, avoid specialist abbreviations and symbols)

**Keywords:** keyword1, keyword2, keyword3… (up to 6 keywords separated by commas)

(for details please see Instructions for Authors available on the *REVAC* website)

Possible sections for Research Article are presented below. Review Articles can have other, individual set of sections.

**1 Introduction**

Text text text text text text. Text text text text text text text text text text. Text text text text text text text (see Figure 1). Text text text text text text text text text [1], text text text text text [1,2]. Text text text text text [3-7] text text…

<Location of Figure 1> (locations of figures and tables should be clearly indicated in the text)

**2 Section of main text**

Text text text text text text text text text in Figure 2. Text text text 35 mL text text [4,8-10]. Text text text text text text tex (see Table 1). Text text text 2 h text text 30 min text text 10 s. Text text text text text text text text…

<Location of Figure 2>

<Location of Table 1>

**2.1 Subsection of main text**

Text text text text text text text 7ºC text. Text text text text text text text text text text text text text text text text in Eq. 1.

a2 = b2 + c2 (1)

**3 Section of main text**

Text text text text text text text. Text text text text in Table 2. Text text text text text text text text text 23%, text text text text text (11). Text text text text text in Scheme 1 text text text.

<Location of Table 2>

<Location of Scheme 1>

**4 Discussion**

Text text text text text text text. Text text text text. Text text text text text text text text text, text text text text text. Text text text text text text text text text text. Text text text text text text text text text text text.

**5 Conclusions**

Text text text text text text text. Text text text text. Text text text text text text text text text, text text text text text. Text text text text text text text. Text text text text text text text text.

**Acknowledgement**

*Should be included if applicable.*

**Research funding**

*Obligatory* (If no funding: Authors state no funding involved.).

**Author contribution**

*Obligatory* (please include proper contribution categories for each author; applicable categories are listed on this website: <https://casrai.org/credit/>).

This section should be prepared according to the following scheme (an example):

**John Smith:** Writing – original draft, Writing – review & editing, Methodology, Formal Analysis; **Martha Poppins:** Writing – original draft, Formal Analysis, Visualization, Project administration; **Yan Zhang:** Resources; …

**Conflict of interest**

*Obligatory* (If no conflict: Authors state no conflict of interest.).

**Data availability statement**

*Should be included if applicable* (for details please see the file “Author Statements” in the Supplementary Materials section on the journal webpage).

Other statements (e.g. Informed consent, Authorization for the use of human subjects, Authorization for the use of experinental animals) should be elaborated in the methodological section of your manuscript.

**References**

1. Surname1 Initial1, Surname2 Initial2. Publication title. Journal title (presented using abbreviations). year of publication;volume number(issue number):pages. doi:XX.XXX/xxxxxxxxxx. (this is an example of published paper; reference style for other types of publications are presented in Instructions for Authors on pages 7-8 and below)

### Zhu L, Dong J, Jiang W, Yuan DD, Jiang H, Yan C, et al. Screening study on rheological behavior and phase transition point of polymer-containing fluids produced under the oil freezing point temperature. Open Chem. 2019;17(1):1442-8. doi: 10.1515/chem-2019-0158. (this is an example of published paper)

1. Kromuszczyńska O, Makowska M, (…)

…

**Figure and Scheme captions**

**Figure 1:** Figure caption.

**Figure 2:** Figure caption.

**Scheme 1:** Scheme caption.

- Figures, schemes, and tables should be numbered consecutively using Arabic numerals and referred to in the text by number, e.g. “in Figure 1” or “(see Figure 1)”; “in Table 1” or “(see Table 1)”, etc.
- For details about figures and tables please see Instructions for Authors (pages 8-9).

**Figures and Schemes** (each figure and scheme on a separate page)

**Tables and Table captions** (each table with its caption on a separate page)

**Appendix** (optional)

**Supplementary material** (if applicable – in a separate WORD file)

**GENERAL RULES**

- text files allowed: MS Word (.DOC, .DOCX),
- graphic files should be included in the DOC/DOCX manuscript file,
- graphic files can be also submitted as separated files – allowed formats: EPS, BMP, JPG, TIFF, GIF,
- pages must be numbered consecutively,
- hyphenation, automatic word-wrap and hard returns within paragraphs are not allowed,
- font size should be no smaller than 12,
- footnotes and endnotes should be avoided,
- do not create symbols as graphics or do not use special fonts that are external to your word processing program,
- for further details please see Instructions for Authors.

**REFERENCE RULES**

References should be listed and numbered in the order they appear in the text. In the text, citations should be indicated by the reference number in square brackets [1]. Multiple citations within a single set of brackets should be separated by commas [1,2]. In case there are more than three sequential citations, they should be given as a range [1-4]. In the references all authors must be included; et al. is not accepted. Do not use italic font in the reference section.

References to personal communications, patent applications and patents pending, computer software, databases, and websites should be referred to as such only in the body of the text. These should be kept to a minimum. The examples are as follows:

- [J. Smith, personal communication],
- [J. Smith and P. Brown, presented at the 4th Symposium on Food Microbiology, Overton, IL, 13-15 June 1989],
- [J. C. Odell, April 1970, Process for batch culturing, U.S. patent 484,363,770],
- [J. Smith, 20 June 1999, Australian Patent Office],
- ... from the GenBank database [http://www.ncbi.nlm.nih.gov/Genbank/index.html],
- ... using ABC software [version 2.2; Department of Microbiology, State University, http://www.stu.micro].

Published or accepted ('in press') manuscripts, books and book chapters, theses, as well as unpublished materials and preprints should be included in the reference list. References to published meeting abstracts should be kept to a minimum.

For all references, list the first six authors; add "et al." if there are additional authors. Standard abbreviations of journal names according to Clarivate Analytics should be used (<https://images.webofknowledge.com/images/help/WOS/A_abrvjt.html>).

Please use the following style for the reference list:

Published papers

- Halpern SD, Ubel PA, Caplan AL. Solid-organ transplantation in HIV-infected patients. N Engl J Med. 2002;347(4):284-7. doi:10.1157 2002-x34742847.
- Rose ME, Huerbin MB, Melick J, Marion DW, Palmer AM, Schiding JK, et al. Regulation of interstitial excitatory amino acid concentrations after cortical contusion injury. Brain Res. 2002;935(1-2):40-6. doi.10.18.x548689553.
- Ellingsen AE, Wilhelmsen I. Sykdomsangst blant medisin- og jusstudenter. Tidsskr Nor Laegeforen. 2002;122(8):785-7. Norwegian.
- Mansharamani M, Chilton BS. The reproductive importance of P-type ATPases. Mol Cell Endocrinol. 2002;188(1-2):22-5. Corrected and republished from: Mol Cell Endocrinol. 2001;183(1-2):123-6.

Unpublished material/forthcoming and preprints

- Tian D, Araki H, Stahl E, Bergelson J, Kreitman M. Signature of balancing selection in Arabidopsis. Proc Natl Acad Sci U S A. Forthcoming 2002.
- Alvarez R. Near optimal neural network estimator for spectral x-ray photon counting data with pileup. arXiv:1702.01006v1 [Preprint]. 2017 [cited 2017 Feb 9]: [11 p.]. Available from: <https://arxiv.org/abs/1702.01006>
- Bar DZ, Atkatsh K, Tavarez U, Erdos MR, Gruenbaum Y, Collins FS. Biotinylation by antibody recognition- A novel method for proximity labeling. BioRxiv 069187 [Preprint]. 2016 [cited 2017 Jan 12]. Available from: <https://www.biorxiv.org/content/10.1101/069187v1>

Electronic journal articles

- Abood S. Quality improvement initiative in nursing homes: the ANA acts in an advisory role. Am J Nurs [Internet]. 2002 Jun [cited 2002 Aug 12];102(6):[about 1 p.]. Available from: <https://ovidsp.tx.ovid.com/> Subscription required.

Books and book chapters

- Murray PR, Rosenthal KS, Kobayashi GS, Pfaller MA. Medical microbiology. 4th ed. St. Louis: Mosby; 2002.
- Gilstrap LC 3rd, Cunningham FG, VanDorsten JP, editors. Operative obstetrics. 2nd ed. New York: McGraw-Hill; 2002.
- Meltzer PS, Kallioniemi A, Trent JM. Chromosome alterations in human solid tumors. In: Vogelstein B, Kinzler KW, editors. The genetic basis of human cancer. New York: McGraw-Hill; 2002. p. 93-113.

Theses

- Borkowski MM. Infant sleep and feeding: a telephone survey of Hispanic Americans [dissertation]. Mount Pleasant (MI): Central Michigan University; 2002.

Conference proceedings

- Harnden P, Joffe JK, Jones WG, editors. Germ cell tumours V. Proceedings of the 5th Germ Cell Tumour Conference; 2001 Sep 13-15; Leeds, UK. New York: Springer; 2002.

Conference paper

- Christensen S, Oppacher F. An analysis of Koza's computational effort statistic for genetic programming. In: Foster JA, Lutton E, Miller J, Ryan C, Tettamanzi AG, editors. Genetic programming. EuroGP 2002: Proceedings of the 5th European Conference on Genetic Programming; 2002 Apr 3-5; Kinsdale, Ireland. Berlin: Springer; 2002. p. 182-91.

Newspaper articles

- Tynan T. Medical improvements lower homicide rate: study sees drop in assault rate. The Washington Post. 2002 Aug 12;Sect. A:2 (col. 4).
